# Supplementary material
Source: bioRxiv or medRxiv preprint supplement (https://www.biorxiv.org/highwire/filestream/35910/field_highwire_adjunct_files/0/121103-1.pdf)
Supplement: Supplementary file [file 121103-1.pdf]

## Supplemental Materials

### Supplemental figures

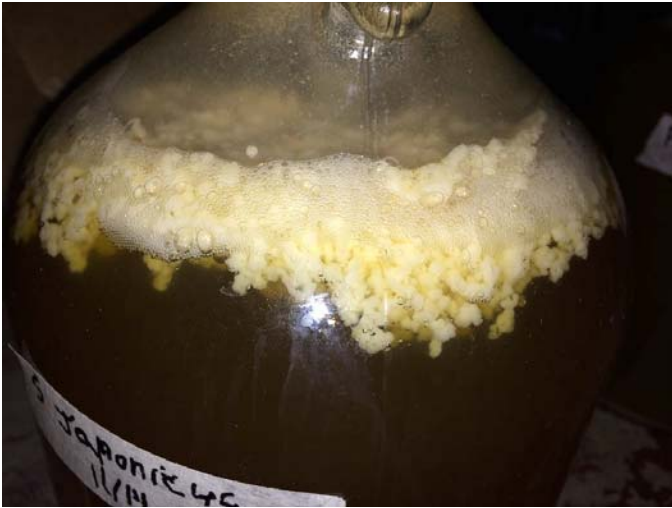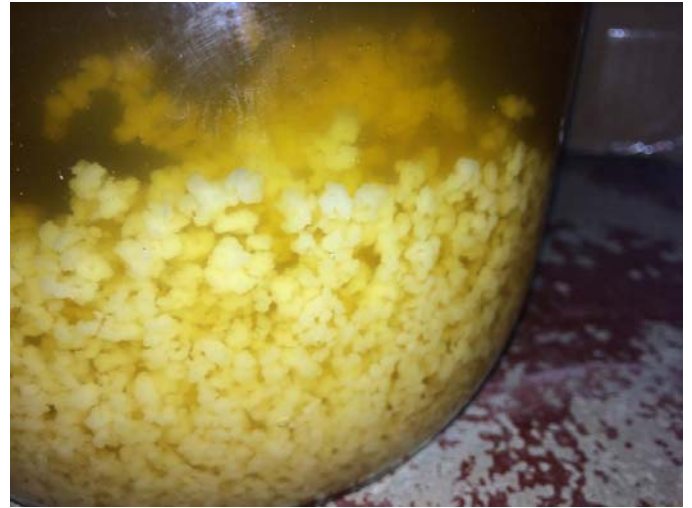

**Supplemental Figure 1. Appearance of *Schizosaccharomyces japonicus* during wort fermentation.** The *S. japonicus* cells formed large, popcorn-shaped floccs during fermentation. Left) *S. japonicus* popcorn during early vigorous fermentation; Right) *S. japonicus* popcorn that settled to the bottom of the fermenter during a later stage of fermentation.

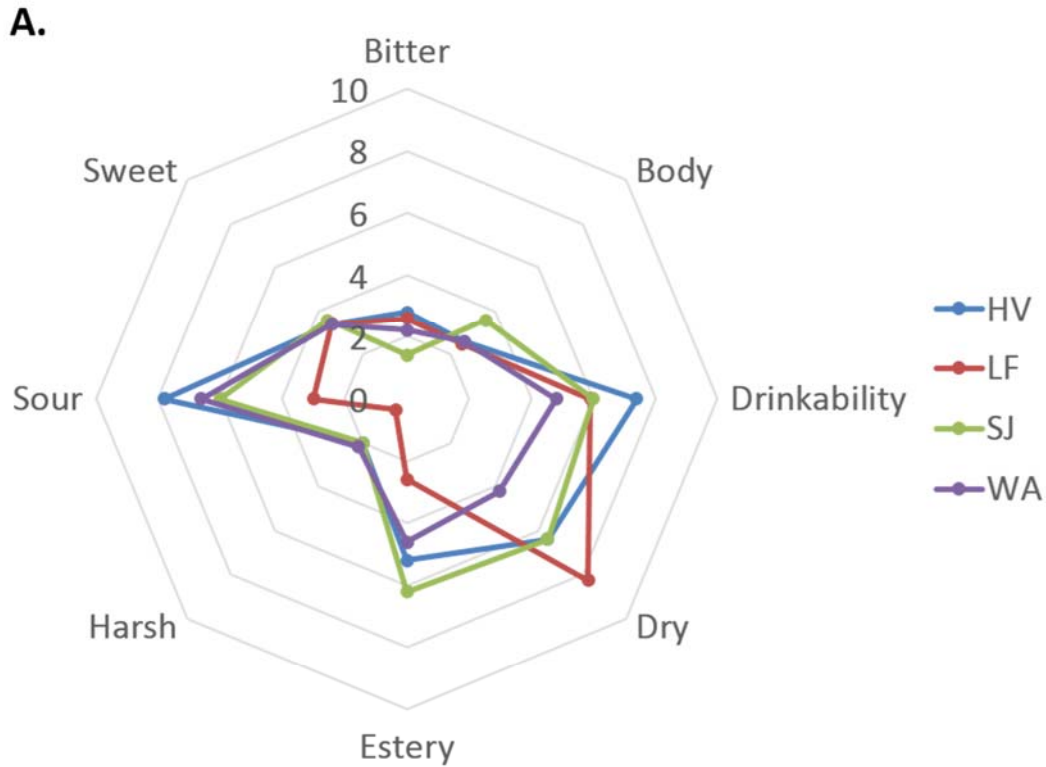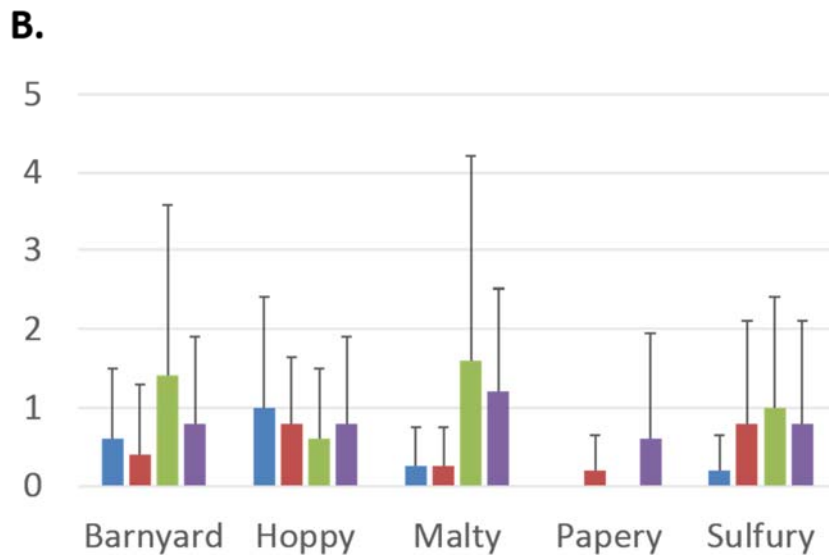

**Supplemental Figure 2. Sensory analysis of beers in Table 3.** **A)** A panel of five people assessed the sour beers described in Table 3 for the flavor descriptors shown in the spider graph as described in [1]. The average values are plotted, and outliers were removed using Grubbs' test with GraphPad Prism. HV = *Hanseniaspora vineae*, LF = *Lachancea fermentati*, SJ = *Schizosaccharomyces japonicus*, and WA = *Wickerhamomyces anomalus*. **B)** The flavor descriptors on the x-axis were also assessed as in **A)**, but their averages values were so low that they were omitted from the spider plot. The bars represent the averages, and the error bars are the standard deviations.

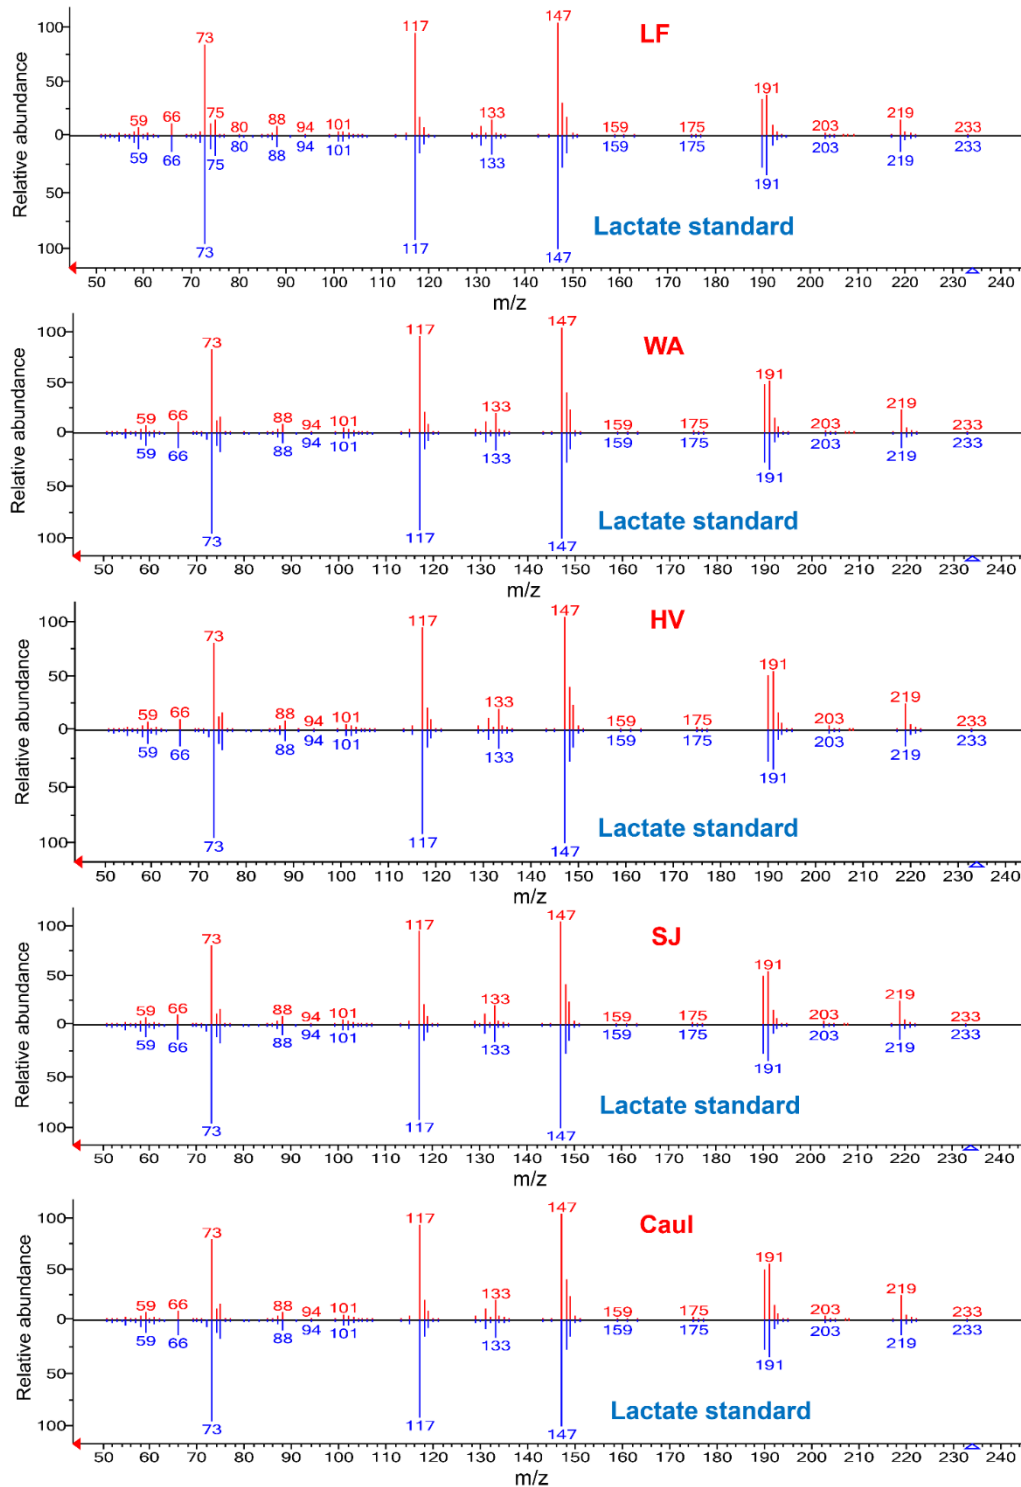

**Supplemental Figure 3. Aligned MS spectra of the lactate standard and the isolated lactate from the indicated beers analyzed by GC-MS. LF = *Lachancea fermentati*, WA = *Wickerhamomyces anomalus*, HV = *Hanseniaspora vineae*, SJ = *Schizosaccharomyces japonicus*, and Caul = Cauldron, a sour beer made by the Upland Brewing Company via mixed fermentation of yeasts with lactic acid bacteria [2].**

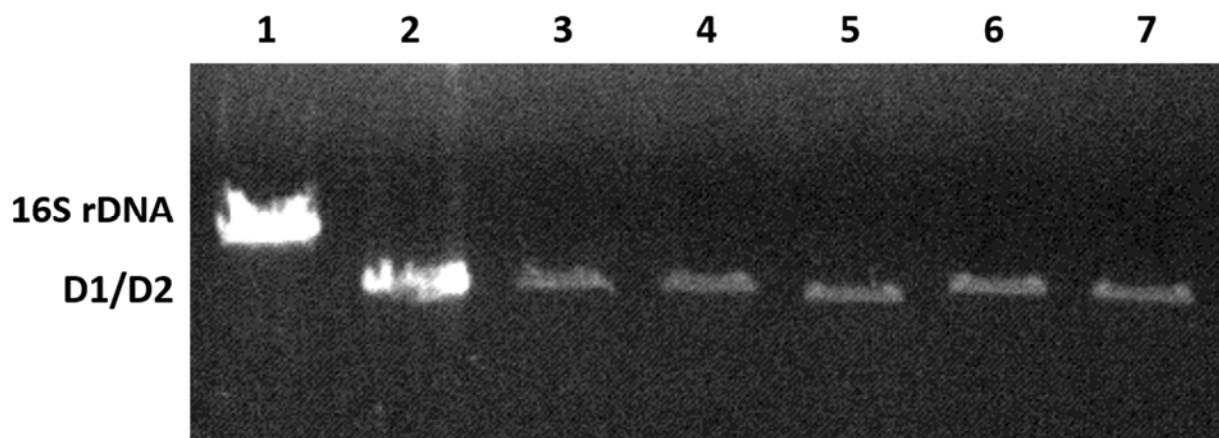

**Supplemental Figure 3. PCR analysis of yeast slurry after in-lab fermentation.** One hundred microliters of yeast slurry was removed from the lab-scale fermenters, and genomic DNA was prepared using the protocol in the Methods and Materials (Section 2.2). PCRs were then performed using two primer sets multiplexed in each reaction: NL1 and NL2 to amplify the yeast rDNA D1/D2 region [3]; and 519 F and 1429R to amplify the variable region of the bacterial 16S rDNA [4]. The expected ~1 kb 16S fragment was amplified from purified *Lactobacillus plantarum* DNA (lane 1), and the ~580 bp D1/D2 fragment was amplified from purified *Saccharomyces cerevisiae* WLP001 DNA (lane 2). No contaminating bacterial DNA was amplified in lanes 3-7 containing DNA prepared from the yeast slurries of fermenters containing *Hanseniaspora vineae* (YH72), *Lachancea fermentati* (WYP39), *Lachancea thermotolerans* (YH140), *Schizosaccharomyces japonicus* (YH156), and *Wickerhamomyces anomalus* (YH82), respectively.

## Supplemental references

- [1] M.J. Wu, F.M. Clarke, P.J. Rogers, P. Young, N. Sales, P.J. O'Doherty, V.J. Higgins, Identification of a protein with antioxidant activity that is important for the protection against beer ageing, *Int J Mol Sci*, 12 (2011) 6089-6103.
- [2] C.M. Rogers, D. Veatch, A. Covey, C. Staton, M.L. Bochman, Terminal acidic shock inhibits sour beer bottle conditioning by *Saccharomyces cerevisiae*, *Food Microbiol*, 57 (2016) 151-158.
- [3] Y.J. Lee, Y.R. Choi, S.Y. Lee, J.T. Park, J.H. Shim, K.H. Park, J.W. Kim, Screening wild yeast strains for alcohol fermentation from various fruits, *Mycobiology*, 39 (2011) 33-39.
- [4] D.P. Mao, Q. Zhou, C.Y. Chen, Z.X. Quan, Coverage evaluation of universal bacterial primers using the metagenomic datasets, *BMC Microbiol*, 12 (2012) 66.
